# Supplementary material for: Dupilumab for the Treatment of Atopic Dermatitis in an Austrian Cohort-Real-Life Data Shows Rosacea-Like Folliculitis
Source: PubMed Central journal article supplement (PMC7230957; doi:10.3390/jcm9041241), 2020-04-24
Supplement: jcm-09-01241-s001.pdf [file jcm-09-01241-s001.pdf]

Supplementary material

# Dupilumab for the Treatment of Atopic Dermatitis in an Austrian Cohort-Real-Life Data Shows Rosacea-Like Folliculitis

Tamara Quint <sup>1</sup>, Patrick M. Brunner <sup>1</sup>, Christoph Sinz <sup>1</sup>, Irene Steiner <sup>2</sup>, Robin Ristl <sup>2</sup>, Kornelia Vigl <sup>3</sup>, Detlev Pirkhammer <sup>3</sup>, Martin Zikeli <sup>4</sup>, Susanne Kimeswenger <sup>5</sup>, Wolfram Hötzenecker <sup>5</sup>, Katharina Neubauer <sup>6</sup>, Norbert Reider <sup>6</sup> and Christine Bangert <sup>1,\*</sup>

<sup>1</sup>Department of Dermatology, Medical University of Vienna, Vienna/Austria

<sup>2</sup>Institute of Medical Statistics, Medical University Vienna, Vienna/Austria

<sup>3</sup>Department of Dermatology, Rudolfstiftung City Hospital, Vienna/Austria

<sup>4</sup>Department of Dermatology, Wiener Neustadt Public Hospital, Wiener Neustadt/Austria

<sup>5</sup>Department of Dermatology, Kepler University Hospital, Linz/Austria

<sup>6</sup>Department of Dermatology, Medical University of Innsbruck, Innsbruck/Austria

\* Correspondence: christine.bangert@meduniwien.ac.at; Tel.: +43-1-40400-77200

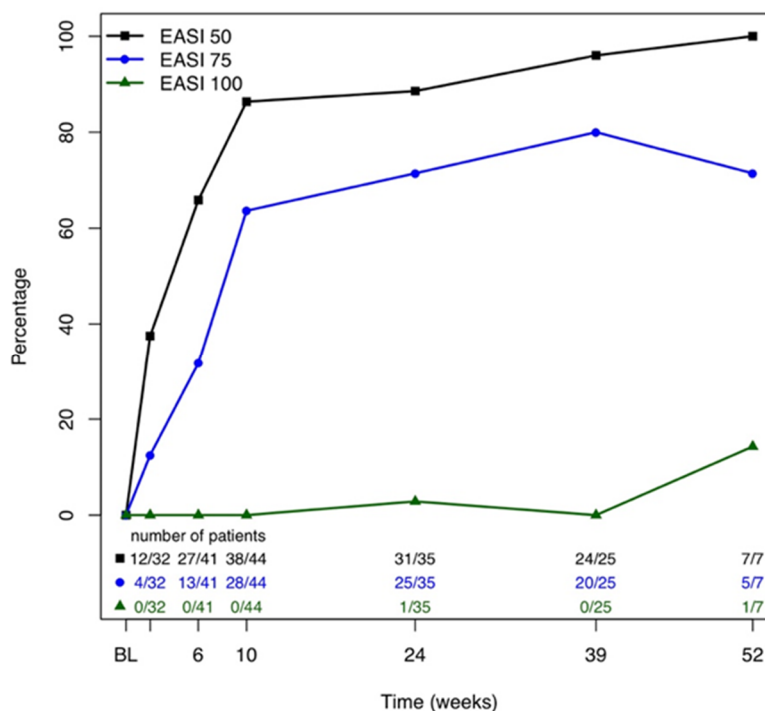

Figure S1. Effectiveness of dupilumab: EASI 50, 75 and 100.
